# Supplementary material for: Assessment of the prognostic and predictive utility of the Breast Cancer Index (BCI): an NCIC CTG MA.14 study
Source: Springer Nature journal article supplement (doi:10.1186/s13058-015-0660-6), 2016-01-04
Supplement: MOESM1 [file 9781614]

Patients accrued to MA.14 = 667  
Patients with tumor blocks = 299 (45%)  
Blocks passing quality control = 292 (98%)

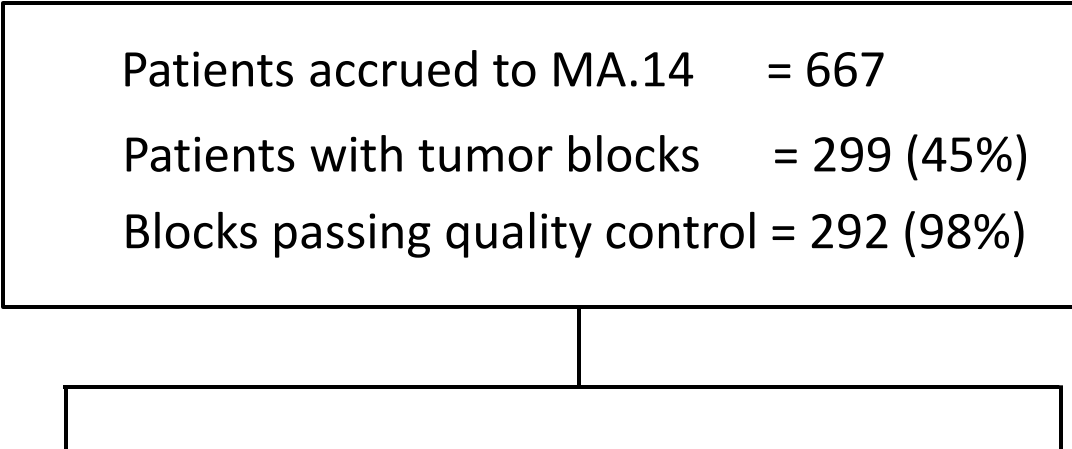

Tamoxifen arm

Patients on MA.14 = 333  
Patients with BCI = 146 (44%)

Tamoxifen + Octreotide arm

Patients on MA.14 = 334  
Patients with BCI = 146 (44%)
