# Supplementary material for: Assessment of the prognostic and predictive utility of the Breast Cancer Index (BCI): an NCIC CTG MA.14 study
Source: Springer Nature journal article supplement (doi:10.1186/s13058-015-0660-6), 2016-01-04

Kaplan-Meier Plot for RFS by Categorical Linear-BCI

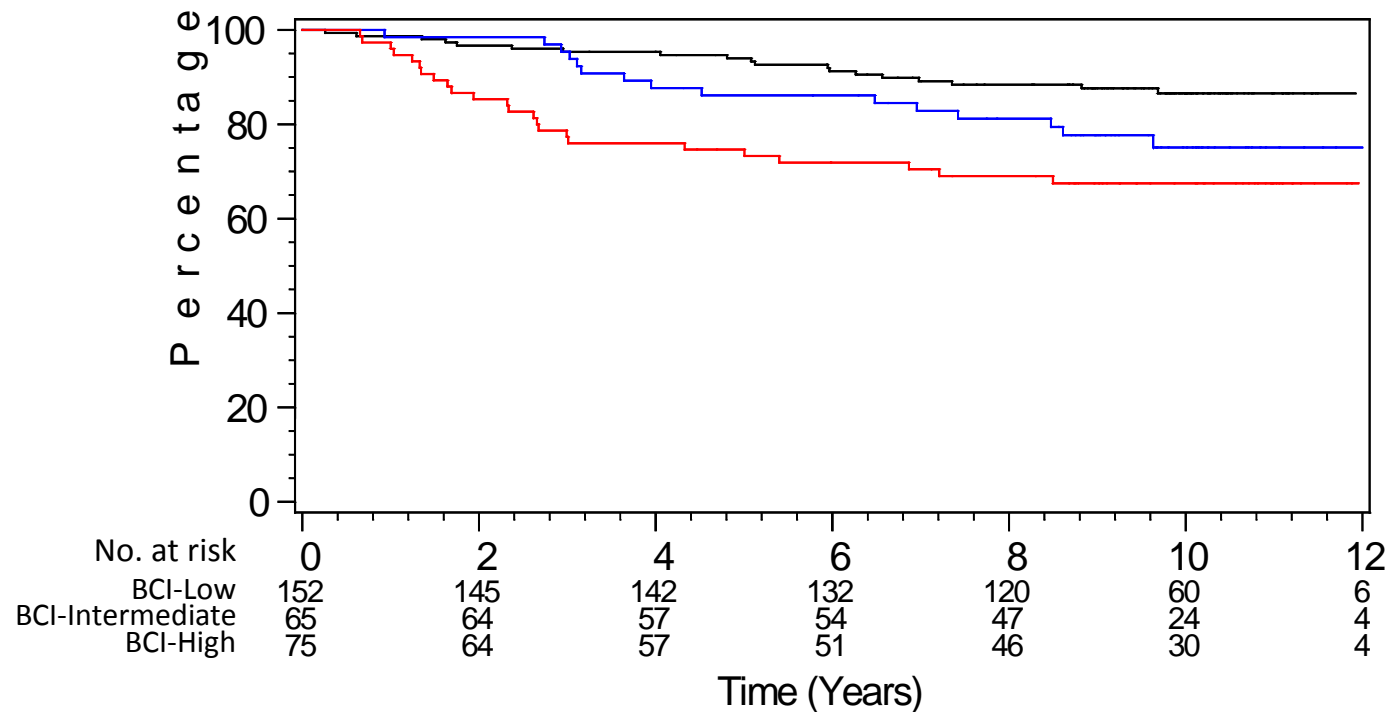

Supplement: MOESM3 [file 9781614]
